# Supplementary material for: 1-Trichloromethyl-1,2,3,4-tetrahydro-beta-carboline (TaClo) Induces the Apoptosis of Dopaminergic Neurons via Oxidative Stress and Neuroinflammation
Source: Oxid Med Cell Longev. 2019 Mar 7;2019:1292891. doi: 10.1155/2019/1292891 (PMC6431519; doi:10.1155/2019/1292891)
Supplement: Supplementary Materials — Supplementary File 1: video recording of a TaClo-treated rat's spontaneous rotary motions. (A) On the 28th day, a TaClo-treated rat did a number of spontaneous rotary motions which may be caused by weak sense of balance. Meanwhile, the rat stayed in a corner of the testing box. (B) Video recording of a rat in the control group. [file 1292891.f1.zip]

Archive with 2 entries (2 files):
- video A.mp4
- video B.mp4
